# Supplementary material for: Satellite remote-sensing capability to assess tropospheric-column ratios of formaldehyde and nitrogen dioxide: case study during the Long Island Sound Tropospheric Ozone Study 2018 (LISTOS 2018) field campaign
Source: Copernicus journal article supplement (doi:10.5194/amt-16-2431-2023), 2023-05-16
Supplement: Supplementary file 1 [file amt-16-2431-2023-supplement.pdf]

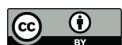

*Supplement of*

**Satellite remote-sensing capability to assess tropospheric-column ratios of formaldehyde and nitrogen dioxide: case study during the Long Island Sound Tropospheric Ozone Study 2018 (LISTOS 2018) field campaign**

**Matthew S. Johnson et al.**

*Correspondence to:* Matthew S. Johnson ([matthew.s.johnson@nasa.gov](mailto:matthew.s.johnson@nasa.gov))

The copyright of individual parts of the supplement might differ from the article licence.

**Table S1. Auxiliary information used for air mass factor (AMF) calculations for NO<sub>2</sub> and HCHO retrievals from NASA OMI, QA4ECV OMI, and TROPOMI.**

| NO <sub>2</sub>         |                                                                                    |                                                                                         |                                                               |
|-------------------------|------------------------------------------------------------------------------------|-----------------------------------------------------------------------------------------|---------------------------------------------------------------|
| Algorithm component     | NASA OMI                                                                           | QA4ECV OMI                                                                              | TROPOMI                                                       |
| Surface Albedo          | Daily geometry-dependent surface Lambertian equivalent reflectivity (GLER) data    | Climatological Lambertian equivalent reflectivity (LER) from OMI v3 surface reflectance | Climatological LER from OMI v3 surface reflectance            |
| Cloud Pressure/Fraction | Updated OMI Cloud Data Product O2–O2 cloud product (OMCDO2N) from the GLER product | OMI O2–O2 product (OMCLDO2)                                                             | O <sub>2</sub> -A band from FRESCO+ wide approach             |
| Cloud Radiance          | VLIDORT-based lookup table                                                         | bePRO/LIDORT-based lookup table                                                         | Doubling-Adding KNMI (DAK) lookup table                       |
| Scattering Weights      | VLIDORT                                                                            | bePRO/LIDORT                                                                            | DAK                                                           |
| A Priori Profiles       | Monthly GMI profiles at 1°×1.25°                                                   | Daily profiles from TM5-MP at 1°×1°                                                     | Daily profiles from TM5-MP at 1°×1°                           |
| HCHO                    |                                                                                    |                                                                                         |                                                               |
| Algorithm component     | NASA OMI                                                                           | QA4ECV OMI                                                                              | TROPOMI                                                       |
| Surface Albedo          | Climatological LER from OMI v3 surface reflectance                                 | Climatological LER from OMI v3 surface reflectance                                      | Climatological LER from OMI v3 surface reflectance            |
| Cloud Pressure/Fraction | OMI O2–O2 product (OMCLDO2)                                                        | OMI O2–O2 product (OMCLDO2)                                                             | Operational cloud product from a Lambertian cloud model (CRB) |
| Cloud Radiance          | VLIDORT-based lookup table                                                         | VLIDORT-based lookup table                                                              | LIDORT-based lookup table                                     |
| Scattering Weights      | VLIDORT                                                                            | VLIDORT                                                                                 | LIDORT                                                        |
| A Priori Profiles       | Monthly climatology from GEOS-Chem at 2°×2.5°                                      | Daily profiles from TM5-MP at 1°×1°                                                     | Daily profiles from TM5-MP at 1°×1°                           |

4 **Table S2. Physical parameterizations used in WRF model simulations.**

| Physical process         | Parameterization (Reference)                                                                |
|--------------------------|---------------------------------------------------------------------------------------------|
| Long-wave radiation      | Rapid Radiative Transfer Model for General Circulation Models (RRTMG) (Iacono et al., 2008) |
| Short-wave radiation     | RRTMG (Iacono et al., 2008)                                                                 |
| Microphysics             | Morrison double-moment (Morrison et al., 2010)                                              |
| Cumulus parameterization | Kain–Fritsch version 2 (Kain, 2004)                                                         |
| Land surface model       | Pleim–Xiu LSM (Pleim and Xiu, 1995)                                                         |
| Surface Layer            | Pleim–Xiu surface layer (Pleim, 2006)                                                       |
| Planetary boundary Layer | ACM2 (Pleim, 2007)                                                                          |

6 **Table S3. Statistical evaluation of NASA OMI, QA4ECV OMI, and TROPOMI retrievals of tropospheric column HCHO. Statistics presented are median bias  $\pm$  bias standard deviation and NMB (%).**

| NASA OMI ( $0.15^\circ \times 0.15^\circ$ ) |               |               |                 | QA4ECV OMI ( $0.15^\circ \times 0.15^\circ$ ) |               |               |                 |
|---------------------------------------------|---------------|---------------|-----------------|-----------------------------------------------|---------------|---------------|-----------------|
|                                             | Clean         | Polluted      | Highly Polluted |                                               | Clean         | Polluted      | Highly Polluted |
| Bias*                                       | 2.8 $\pm$ 6.2 | 4.6 $\pm$ 7.9 | -2.3 $\pm$ 9.2  | Bias*                                         | 2.7 $\pm$ 7.3 | 2.1 $\pm$ 8.7 | -3.8 $\pm$ 7.4  |
| NMB                                         | 75.1          | 30.3          | -8.9            | NMB                                           | 72.1          | 13.7          | -14.6           |
| TROPOMI ( $0.15^\circ \times 0.15^\circ$ )  |               |               |                 | TROPOMI ( $0.05^\circ \times 0.05^\circ$ )    |               |               |                 |
|                                             | Clean         | Polluted      | Highly Polluted |                                               | Clean         | Polluted      | Highly Polluted |
| Bias*                                       | 3.1 $\pm$ 1.4 | 1.8 $\pm$ 4.4 | -2.2 $\pm$ 4.8  | Bias*                                         | 2.4 $\pm$ 2.3 | 1.3 $\pm$ 6.5 | -2.7 $\pm$ 7.0  |
| NMB                                         | 78.1          | 12.5          | -8.7            | NMB                                           | 60.9          | 8.5           | -10.1           |

8 \*bias units are  $\times 10^{15}$  molecules  $\text{cm}^{-2}$ .

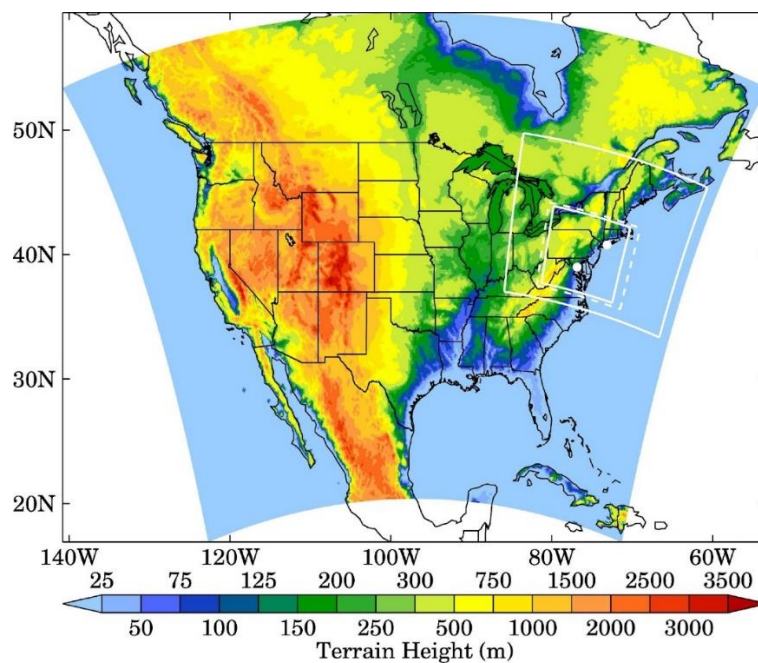

Figure S1: WRF-CMAQ modeling domains applied in this study. The white solid lines show the boundaries of the two CMAQ domains while the dotted white lines represent the boundary of the inner WRF domain. Terrain height for the outer WRF domain is also shown. The two white dots mark the regions of focus in the OWLETS-2 and LISTOS 2018 campaigns.

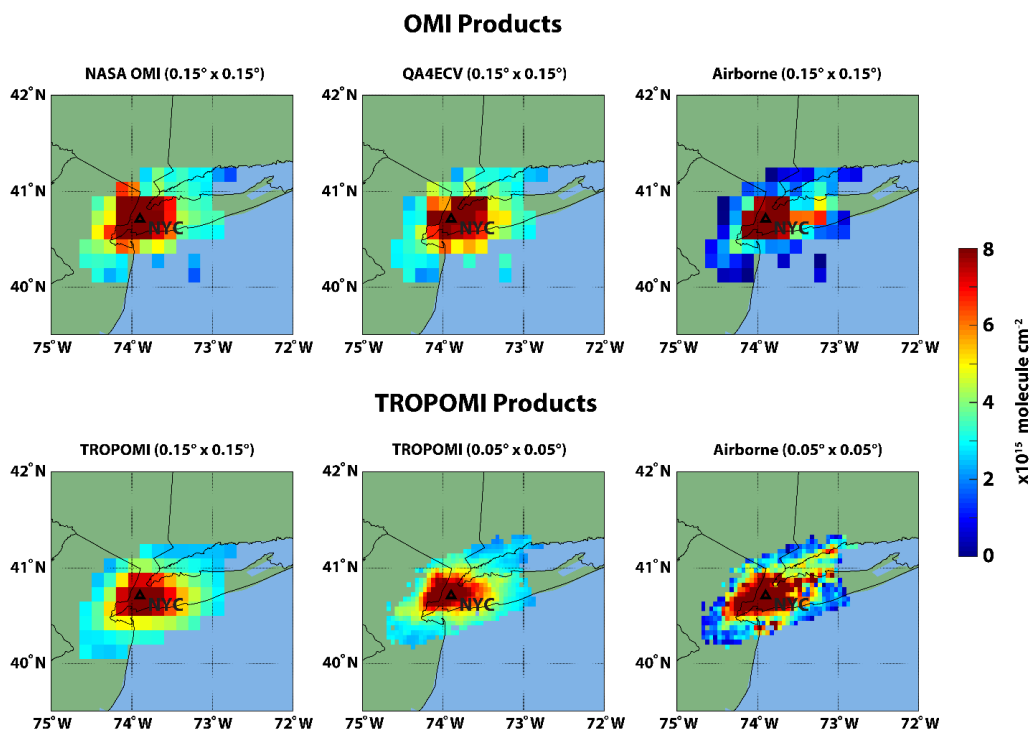

Figure S2: NASA OMI, QA4ECV OMI, TROPOMI, and airborne tropospheric column  $\text{NO}_2$  retrievals averaged for all flights conducted during the field campaign. All co-located OMI satellite and airborne remote-sensing tropospheric column  $\text{NO}_2$  values are averaged at a  $0.15^\circ \times 0.15^\circ$  resolution and co-located TROPOMI data are averaged at both  $0.05^\circ \times 0.05^\circ$  and  $0.15^\circ \times 0.15^\circ$  spatial resolutions. The black triangle indicates the location of the city of NYC.

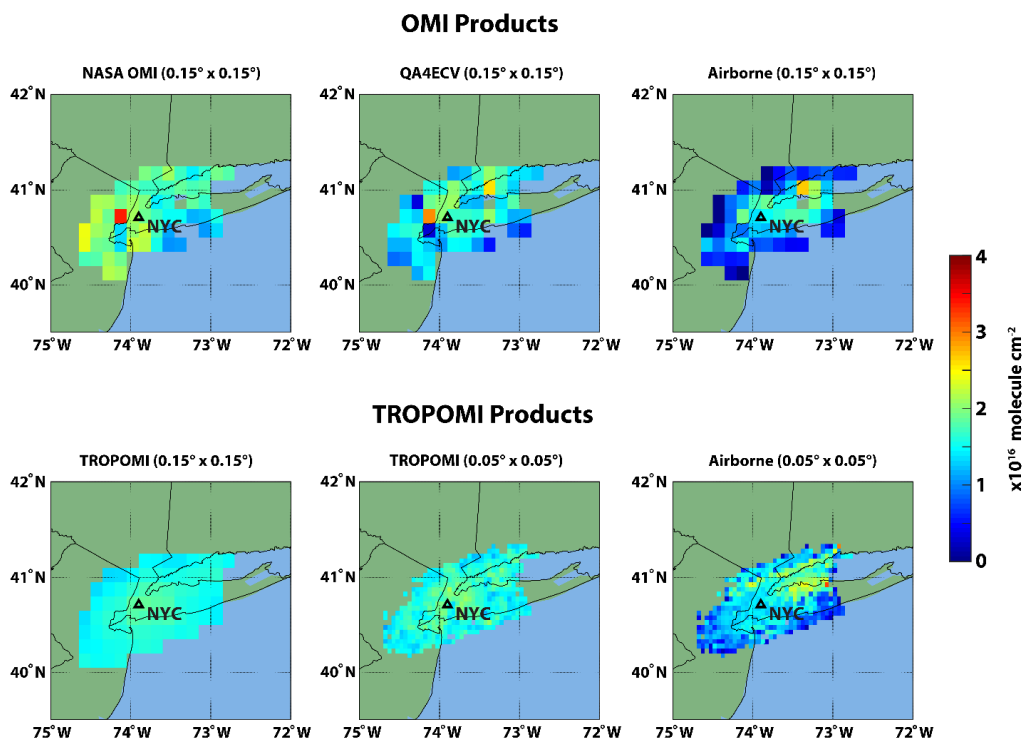

Figure S3: NASA OMI, QA4ECV OMI, TROPOMI, and airborne tropospheric column HCHO retrievals averaged for all flights conducted during the field campaign. All co-located OMI satellite and airborne remote-sensing tropospheric column HCHO values are averaged at a  $0.15^\circ \times 0.15^\circ$  resolution and co-located TROPOMI data are averaged at both  $0.05^\circ \times 0.05^\circ$  and  $0.15^\circ \times 0.15^\circ$  spatial resolutions. The black triangle indicates the location of the city of NYC.

## OMI Products

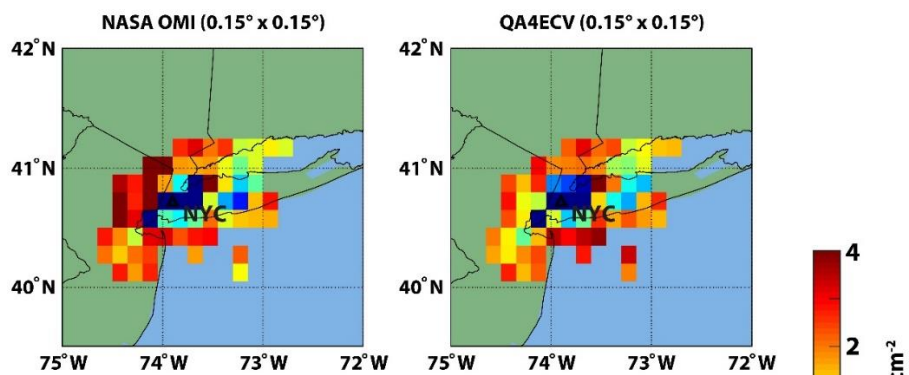

## TROPOMI Products

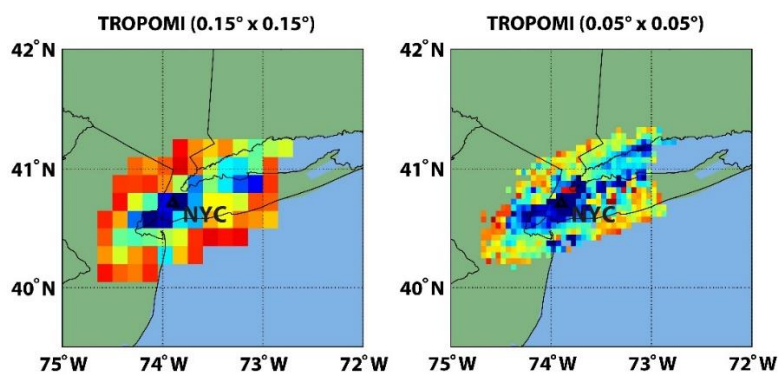

Figure S4: NASA OMI, QA4ECV OMI, and TROPOMI biases in tropospheric column NO<sub>2</sub> retrievals averaged for all flights conducted during the field campaign. All OMI satellite bias values compared to airborne remote-sensing tropospheric column NO<sub>2</sub> values are averaged at a 0.15° × 0.15° resolution and TROPOMI data are averaged at both 0.05° × 0.05° and 0.15° × 0.15° spatial resolutions. The black triangle indicates the location of the city of NYC.

## OMI Products

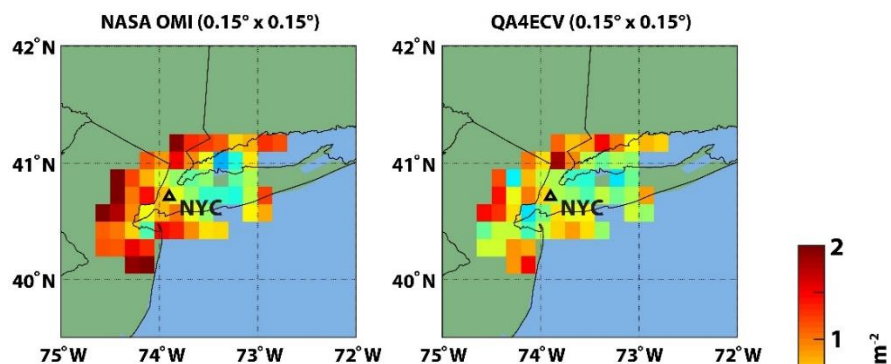

## TROPOMI Products

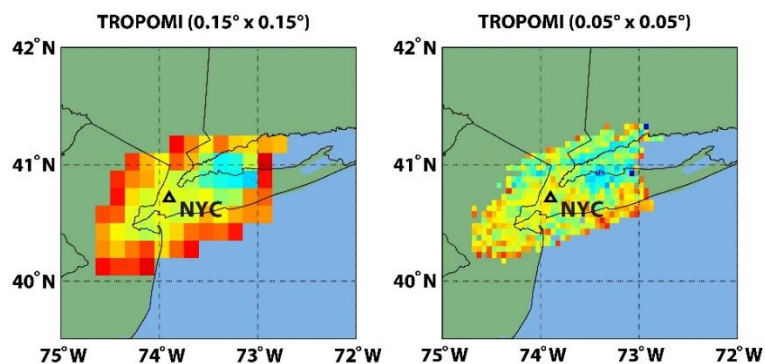

Figure S5: NASA OMI, QA4ECV OMI, and TROPOMI biases in tropospheric column HCHO retrievals averaged for all flights conducted during the field campaign. All OMI satellite bias values compared to airborne remote-sensing tropospheric column HCHO values are averaged at a  $0.15^\circ \times 0.15^\circ$  resolution and TROPOMI data are averaged at both  $0.05^\circ \times 0.05^\circ$  and  $0.15^\circ \times 0.15^\circ$  spatial resolutions. The black triangle indicates the location of the city of NYC.

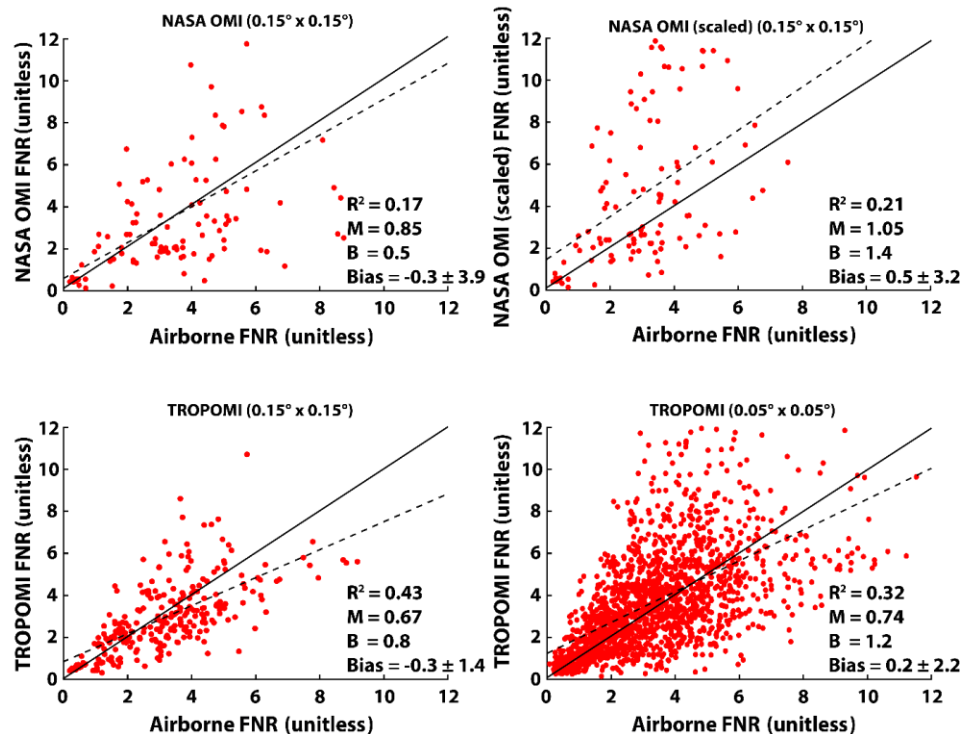

Figure S6: Comparison of satellite (NASA OMI and TROPOMI) reprocessed tropospheric column FNRs and airborne-retrieved tropospheric FNR (unitless) for each co-located measurement taken during the field campaigns. The OMI FNR retrievals calculated with the scaled WRF-CMAQ profiles are identified in the y-axis and titles as “scaled”. The solid black line shows the 1:1 comparison and the dashed line shows the linear regression fit. The figure inset shows the main statistics (coefficient of determination ( $R^2$ ), slope (M), y-intercept (B), and median bias and bias standard deviation) of the comparison.

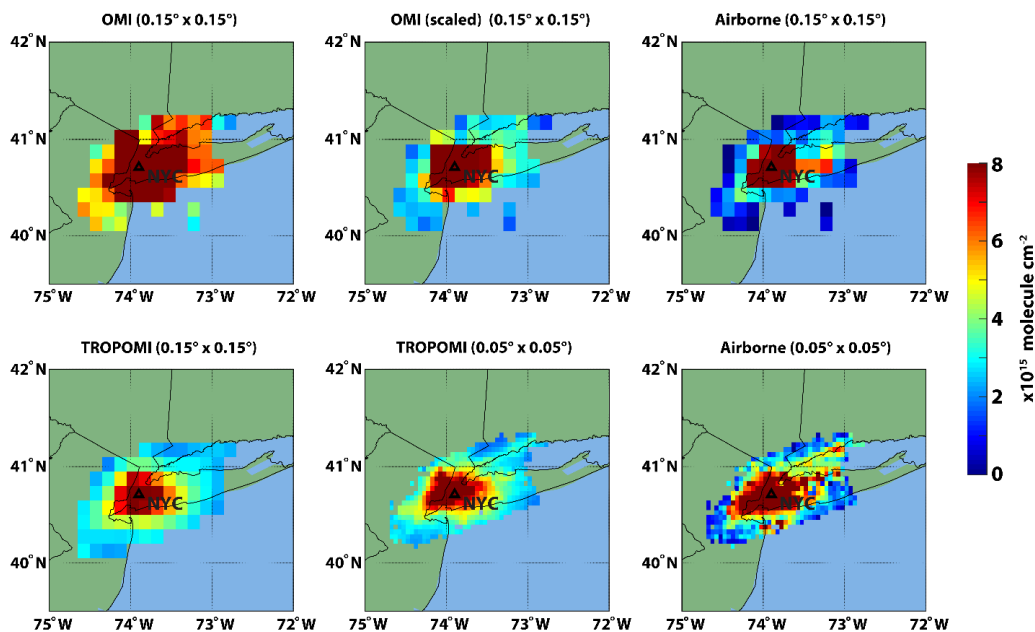

Figure S7: NASA OMI and TROPOMI reprocessed retrievals of tropospheric column NO<sub>2</sub> and airborne observations averaged for all flights conducted during the field campaign. All co-located satellite and airborne remote-sensing tropospheric column NO<sub>2</sub> values are averaged at  $0.15^\circ \times 0.15^\circ$  for the OMI intercomparison and  $0.05^\circ \times 0.05^\circ$  spatial resolution for TROPOMI. The OMI tropospheric column NO<sub>2</sub> retrievals calculated with the scaled WRF-CMAQ profiles are identified in the titles as “scaled”. The black triangle indicates the location of the city of NYC.

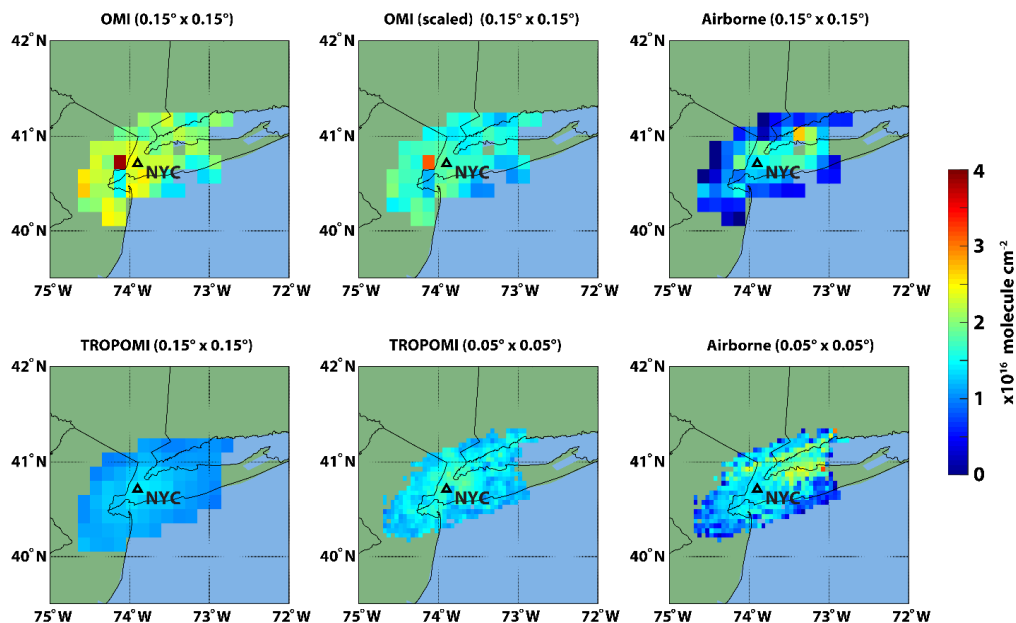

Figure S8: NASA OMI and TROPOMI reprocessed retrievals of tropospheric column HCHO and airborne observations averaged for all flights conducted during the field campaign. All co-located satellite and airborne remote-sensing tropospheric column HCHO values are averaged at  $0.15^\circ \times 0.15^\circ$  for the OMI intercomparison and  $0.05^\circ \times 0.05^\circ$  spatial resolution for TROPOMI. The OMI tropospheric column HCHO retrievals calculated with the scaled WRF-CMAQ profiles are identified in the titles as “scaled”. The black triangle indicates the location of the city of NYC.

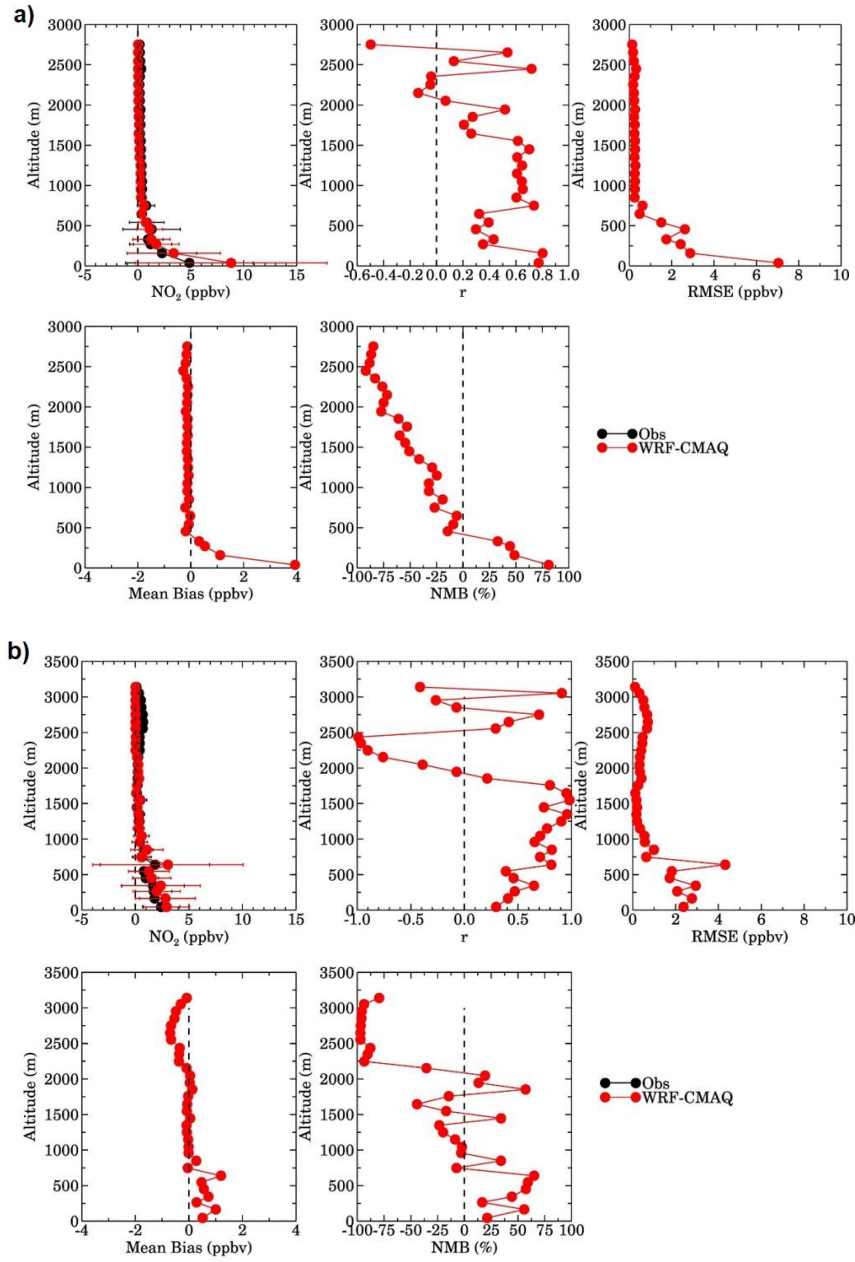

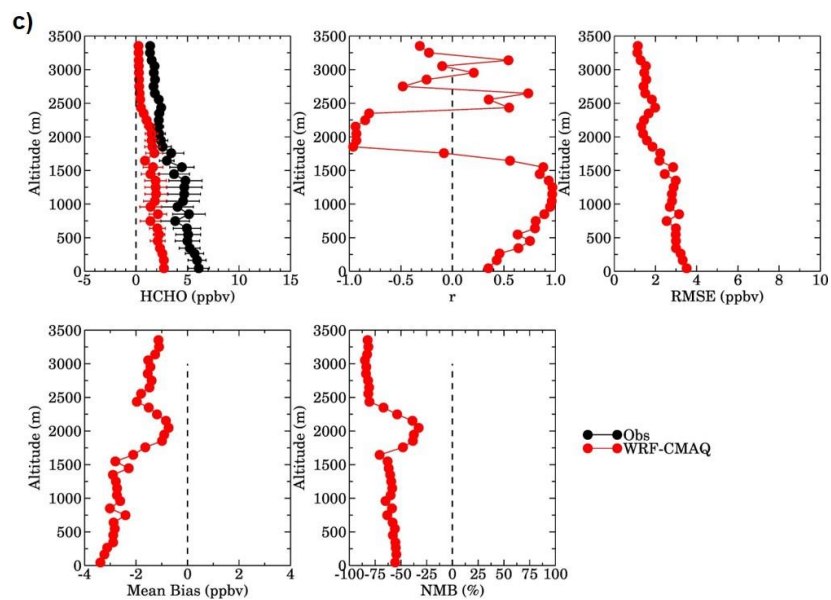

Figure S9: WRF-CMAQ-predicted concentrations (ppb) of  $\text{NO}_2$  evaluated with airborne observations during a) OWLETS-2 and b) LISTOS 2018 and c) WRF-CMAQ-predicted HCHO data during LISTOS 2018. The model (red dots/line) and airborne observations (black dots/line) are averaged at 100 m vertical resolution for all measurements during each field campaign. The statistics of the comparison are presented as well.

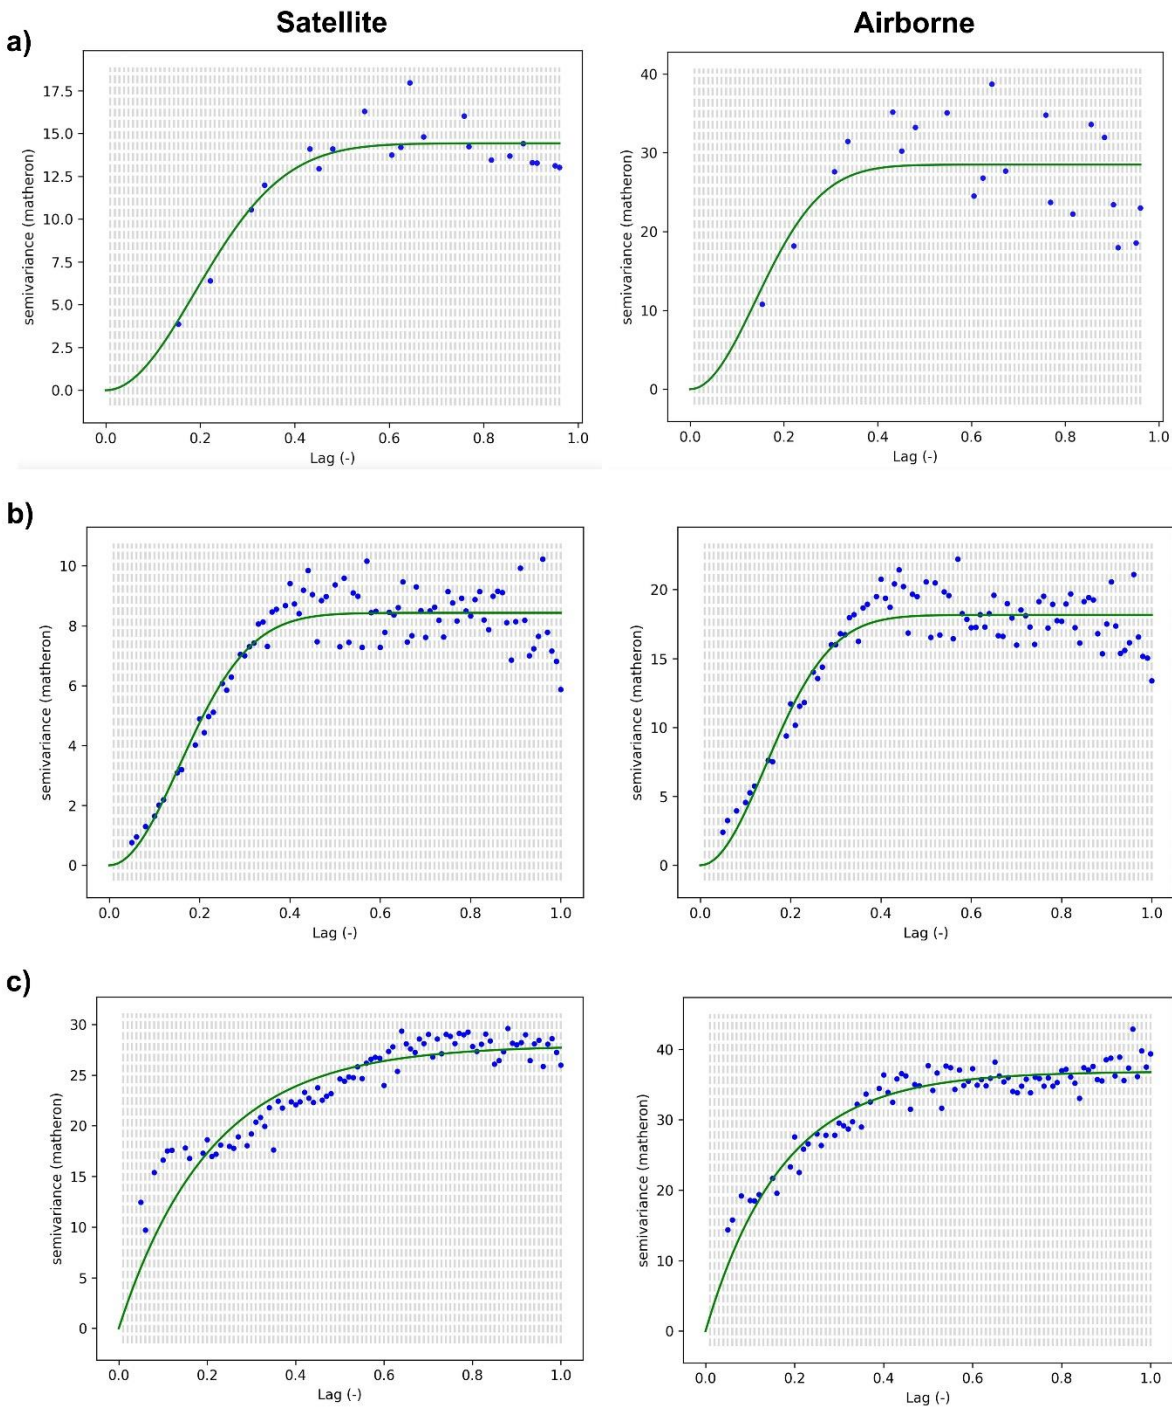

**Figure S10: Semivariograms and the fitted stable Gaussian functions for a) TROPOMI NO<sub>2</sub>, b) NASA OMI NO<sub>2</sub>, and c) TROPOMI HCHO compared to airborne columns. Note the variation between y-axis values in the figure panels.**

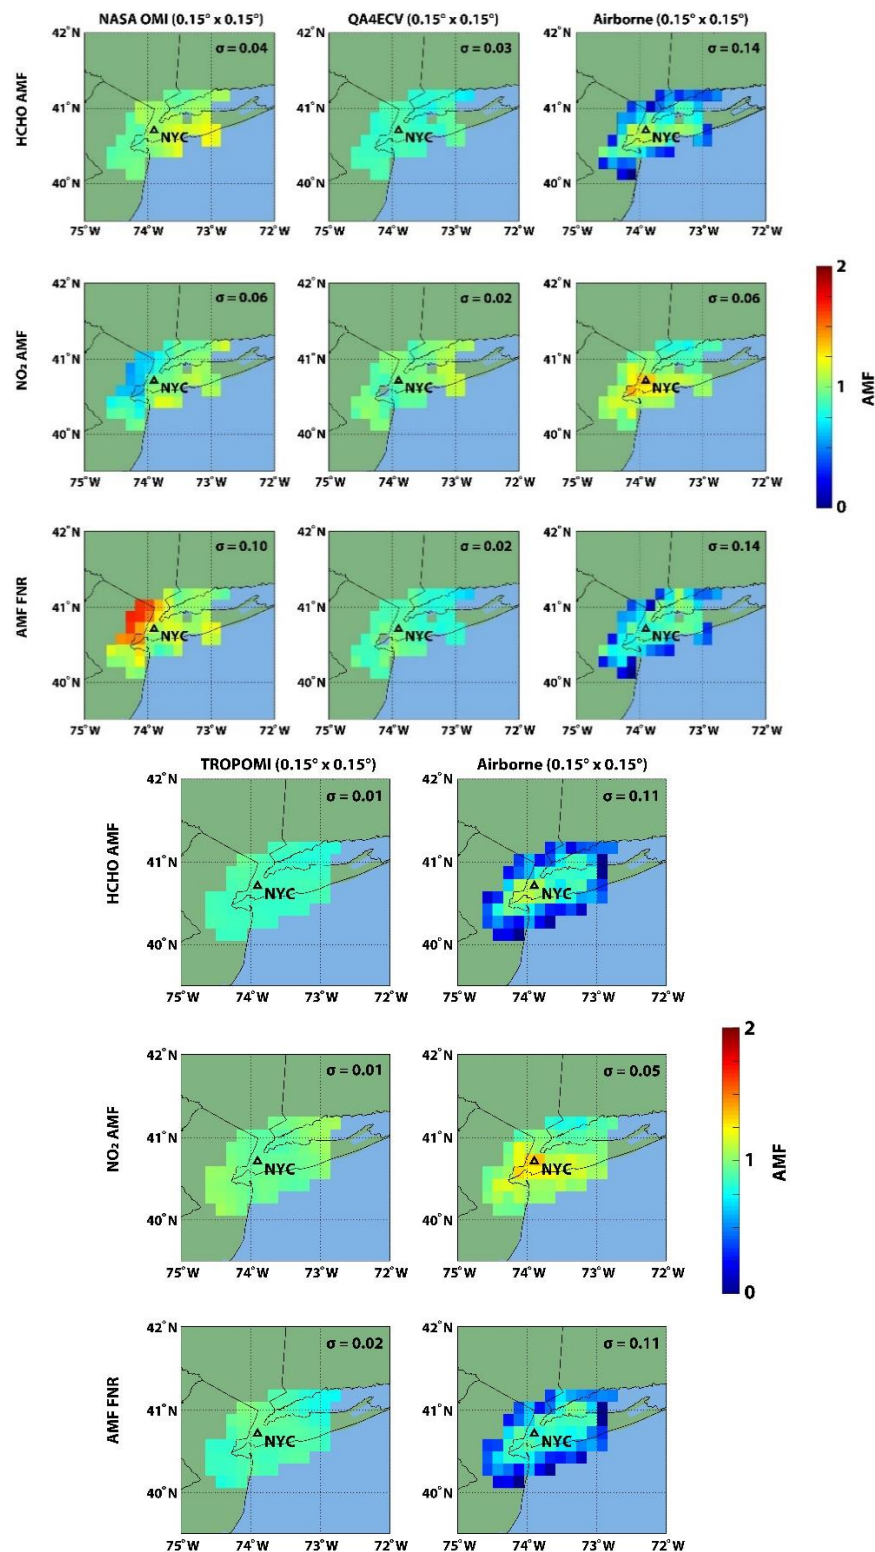

Figure S11: HCHO and NO<sub>2</sub> AMFs, and the resulting ratios of the HCHO and NO<sub>2</sub> AMFs (FNR AMFs), from NASA OMI, QA4ECV OMI, TROPOMI, and airborne retrievals averaged for all flights conducted during the field campaign. All co-located satellite and airborne remote-sensing AMFs are averaged at 0.15° × 0.15° spatial resolution. The black triangle indicates the location of the city of NYC. The figure inset illustrates the standard deviation ( $\sigma$ ) of the campaign-averaged AMF values.

## References

- 74 Iacono, M. J., Delamere, J. S., Mlawer, E. J., Shephard, M. W., Clough, S. A., and Collins, W. D.: Radiative forcing  
by long-lived greenhouse gases: Calculations with the AER radiative transfer models, *J. Geophys. Res.*, 113,  
76 D13103, doi:10.1029/2008JD009944, 2008.
- Kain, J. S.: The Kain–Fritsch convective parameterization: An update, *J. Appl. Meteor.*, 43, 170–181,  
78 [https://doi.org/10.1175/1520-0450\(2004\)043<0170:TKCPAU>2.0.CO;2](https://doi.org/10.1175/1520-0450(2004)043<0170:TKCPAU>2.0.CO;2), 2004.
- Morrison, H., Thompson, G., and Tatarskii, V.: Impact of Cloud Microphysics on the Development of Trailing  
80 Stratiform Precipitation in a Simulated Squall Line: Comparison of One- and Two-Moment Schemes, *Mon.*  
*Weather Rev.*, 137, 991–1007, <https://doi.org/10.1175/2008MWR2556.1>, 2009.
- 82 Pleim, J. E. and Xiu, A.: Development and Testing of a Surface Flux and Planetary Boundary Layer Model for  
Application in Mesoscale Models, *J. Appl. Meteorol.*, 34, 16–32, <https://doi.org/10.1175/1520-0450-34.1.16>,  
84 1995.
- Pleim, J. E.: A Simple, Efficient Solution of Flux–Profile Relationships in the Atmospheric Surface Layer, *J. Appl.*  
86 *Meteorol. Clim.*, 45, 341–347, <https://doi.org/10.1175/JAM2339.1>, 2006.
- Pleim, J. E.: A combined local and nonlocal closure model for the atmospheric boundary layer. Part I: Model  
88 description and testing, *J. Appl. Meteorol. Clim.* 46, 1383–1395, <https://doi.org/10.1175/JAM2539.1>, 2007.
